# Supplementary material for: A facile synthesis of a uniform constitution of three-dimensionally ordered macroporous TiO2–carbon nanocomposites with hierarchical pores for lithium ion batteries
Source: Royal Society of Chemistry journal article supplement (doi:10.1039/c4ta06985d), 2015-01-01
Supplement: c4ta06985d1.pdf [file c4ta06985d1.pdf]

## Supporting information

### **Facile synthesis of uniform constitution three-dimensionally ordered macroporous TiO<sub>2</sub>-carbon nanocomposites with hierarchical pores for lithium ion batteries**

Lihong Song,<sup>ab</sup> Ling Li,<sup>b</sup> Xin Gao,<sup>ab</sup> Jiabin Zhao,<sup>b</sup> Ting Lu<sup>b</sup> and Zhi Liu<sup>\*ab</sup>

*<sup>a</sup>Institute of Chemistry for Functionalized Materials, Faculty of Chemistry and Chemical Engineering, Liaoning Normal University, Dalian 116029, P. R. China*

*<sup>b</sup>Faculty of Chemistry and Chemical Engineering, Liaoning Normal University, Dalian 116029, P. R. China*

\*Corresponding author. Tel.: +86 411 82156989; fax: +86 411 82156858.

E-mail address: zhiliu@lnnu.edu.cn

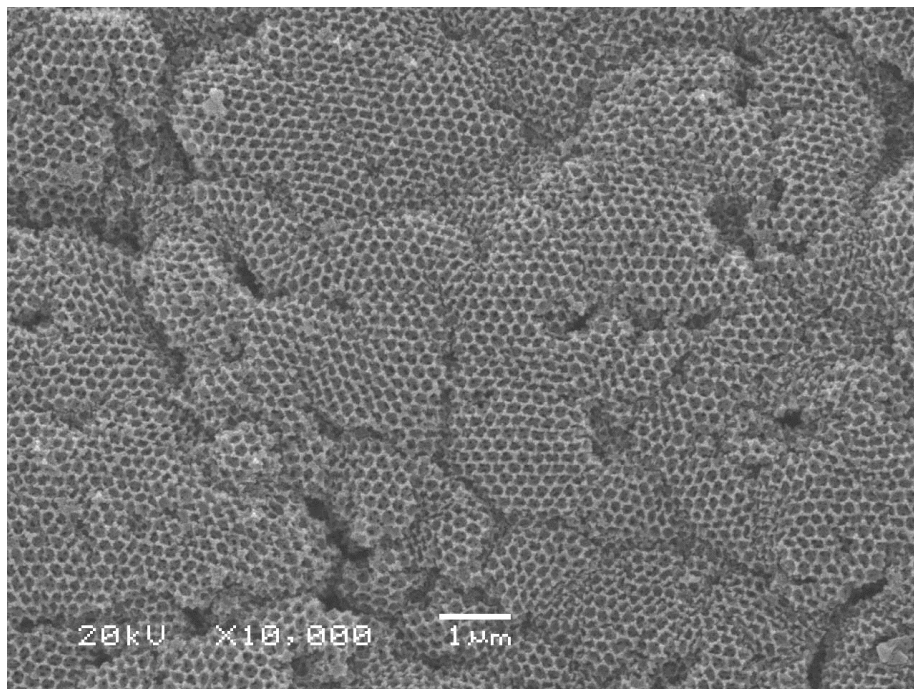

Fig. S1 SEM image of 3DOM TiO<sub>2</sub> nanocrystals synthesized by the CCTS with TBT-citric acid solution as the precursor.

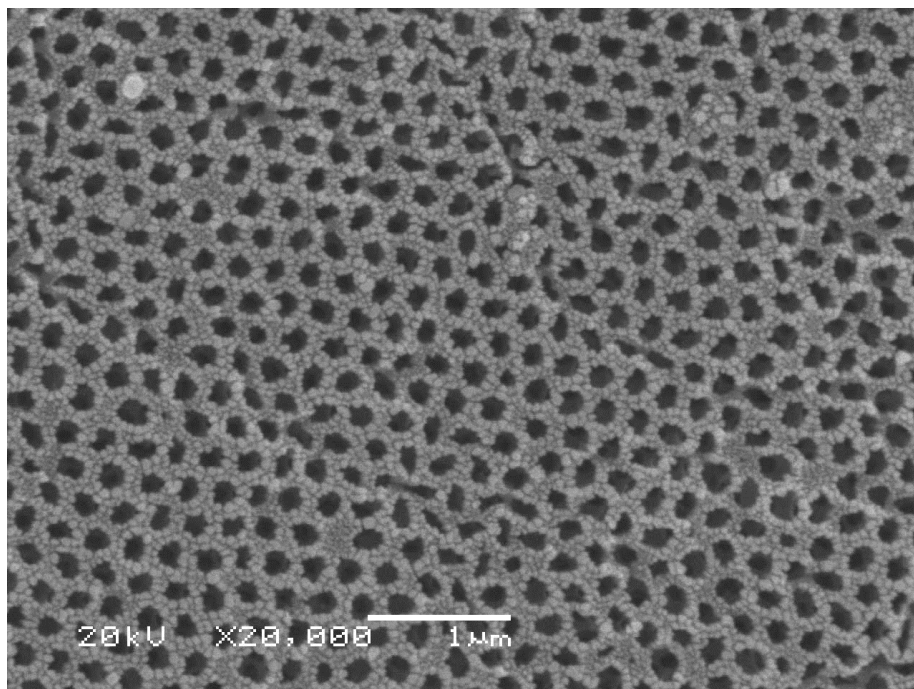

Fig. S2 SEM image of 3DOM carbon synthesized by the CCTS  
with PF resol as the precursor.

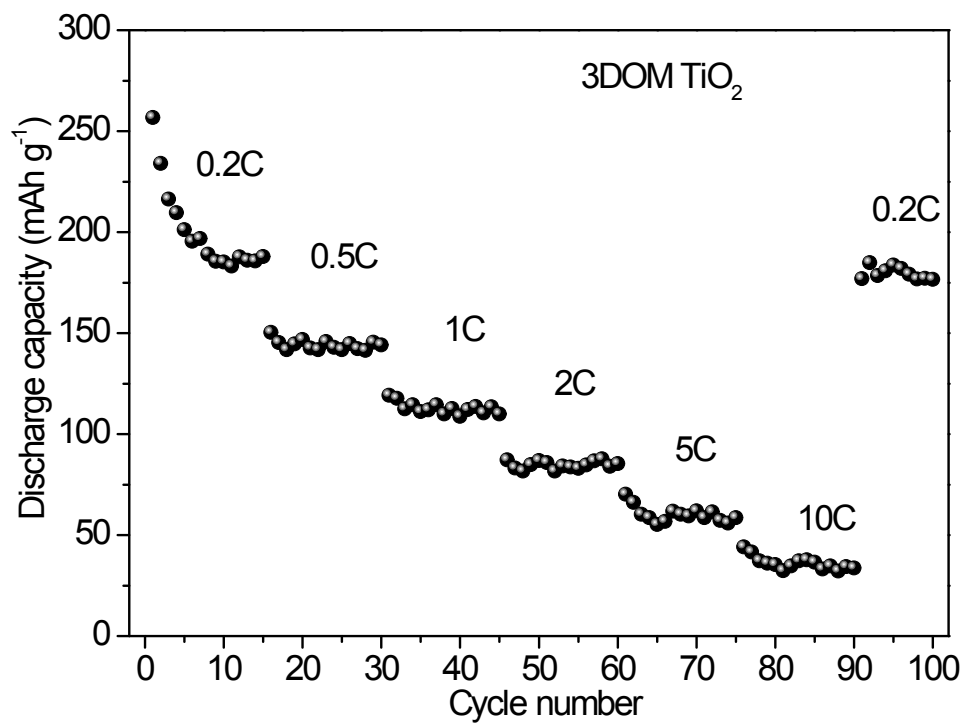

Fig. S3 Rate capability of the 3DOM TiO<sub>2</sub> electrode as a function of current density from 0.2C to 10C.

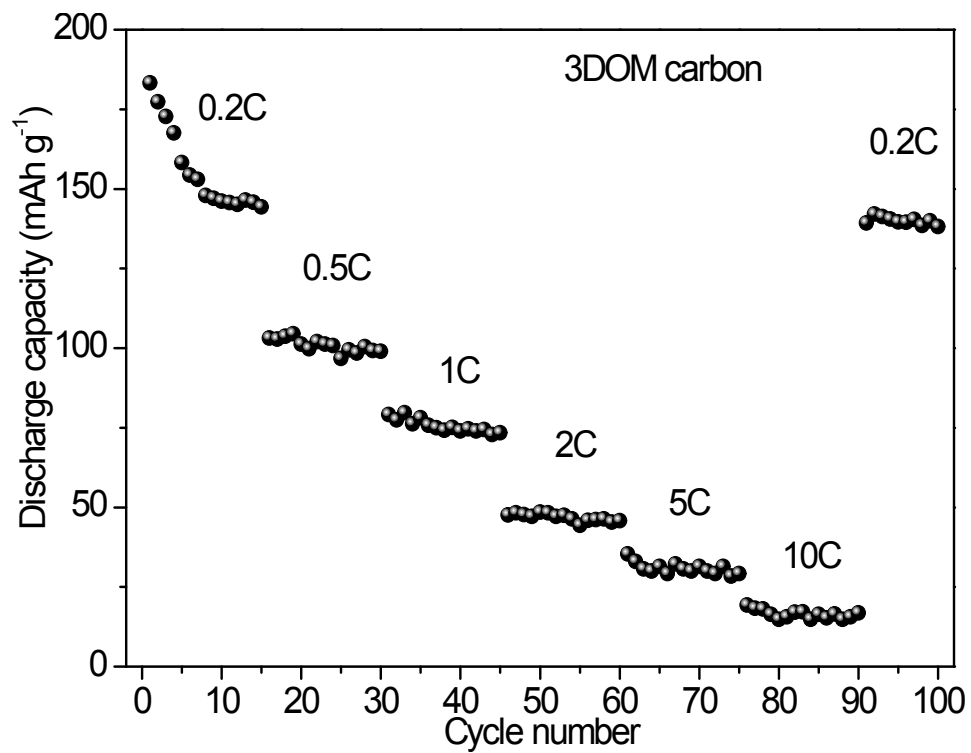

Fig. S4 Rate capability of the 3DOM carbon electrode as a function of current density from 0.2C to 10C.

Table S1 Comparison of the capacitive performances with other Ti-based porous anode materials reported previously

| Samples                                                                        | Specification                                                         | Current density<br>(mA g <sup>-1</sup> ) | Discharging capacity<br>(mA h g <sup>-1</sup> ) | Reference        |
|--------------------------------------------------------------------------------|-----------------------------------------------------------------------|------------------------------------------|-------------------------------------------------|------------------|
| <b>TCN3</b>                                                                    | 55.4 wt.% of<br>TiO <sub>2</sub> content                              | <b>34 (0.2C)</b>                         | <b>625 (15 cycles)</b>                          | <b>This work</b> |
|                                                                                |                                                                       | <b>170 (1C)</b>                          | <b>457 (15 cycles)</b>                          |                  |
|                                                                                |                                                                       | <b>1700 (10C)</b>                        | <b>132 (15 cycles)</b>                          |                  |
| 3DOM Li <sub>4</sub> Ti <sub>5</sub> O <sub>12</sub>                           | 75% void filling of<br>PMMA templates                                 | 117.7                                    | 155 (10 cycles)                                 | [S1]             |
| Mesoporous Li <sub>4</sub> Ti <sub>5</sub> O <sub>12</sub> /C<br>nanocomposite | 84 wt.% of<br>Li <sub>4</sub> Ti <sub>5</sub> O <sub>12</sub> content | 175 (1C)<br>1750 (10C)                   | 141 (5 cycles)<br>121.3 (5 cycles)              | [S2]             |
| Ordered mesoporous TiNb <sub>2</sub> O <sub>7</sub>                            | Synthesized by EISA<br>with NaOH etching                              | 38.7 (0.1C)                              | 289 (10 cycles)                                 | [S3]             |
|                                                                                |                                                                       | 193.5 (0.5C)                             | 275 (10 cycles)                                 |                  |
|                                                                                |                                                                       | 1935 (5C)                                | 220 (10 cycles)                                 |                  |
| C-TiNb <sub>2</sub> O <sub>7</sub>                                             | Synthesized by<br>sol-gel method                                      | 38.7 (0.1C)                              | 285 (30 cycles)                                 | [S4]             |

## References

- S1 E. M. Sorensen, S. J. Barry, H. K. Jung, J. R. Rondinelli, J. T. Vaughey and K. R. Poeppelmeier, *Chem. Mater.*, 2006, **18**, 482.
- S2 L. F. Shen, X. G. Zhang, E. Uchaker, C. Z. Yuan and G. Z. Cao, *Adv. Energy Mater.*, 2012, **2**, 691.
- S3 C. S. Jo, Y. Kim, J. K. Hwang, J. M. Shim, J. Y. Chun and J. W. Lee, *Chem. Mater.*, 2014, **26**, 3508.
- S4 J. T. Han, Y. H. Huang and J. B. Goodenough, *Chem. Mater.*, 2011, **23**, 2027.
